# Supplementary material
Source: PubMed Central journal article supplement (PMC5177794)
Supplement: NIHMS773825-supplement.pdf [file NIHMS773825-supplement.pdf]

# Pathway-Specific Dopamine Abnormalities in Schizophrenia

## *Supplemental Information*

### **Supplemental Methods**

#### **Criteria for the Range and Source of Literature to Review**

To collect data papers to include in this review, a literature search was performed in August 2015 in PubMed with the specifiers: “dopamine” [Title] and “schizophrenia” [Title], and filters “Humans” and “English”. This yielded roughly 800 papers. Of these, we only included molecular imaging studies of dopamine in schizophrenia that used highly rigorous quantitative methods and experimental designs. We avoided dopamine-D<sub>2</sub> receptor studies that included participants currently on antipsychotic treatment. When studies reported aggregation or reanalysis of previously published datasets, the study with the larger cohort was included.

**Table S1. PET and SPECT imaging findings of the dopamine system in schizophrenia**

| Publication                                     | Tracer/ Challenge        | Measure                             | Sample                                        | Results by Brain Region: |     |     |      |         |         |          |             |             |          |            |     |     |       |       |      | Reported Correlates / Notes | Meta-Analysis Inclusion |     |        |          |                                                                                                                                                                                                                                                                                                                                                                                                                                                                                                                                                                                          |           |
|-------------------------------------------------|--------------------------|-------------------------------------|-----------------------------------------------|--------------------------|-----|-----|------|---------|---------|----------|-------------|-------------|----------|------------|-----|-----|-------|-------|------|-----------------------------|-------------------------|-----|--------|----------|------------------------------------------------------------------------------------------------------------------------------------------------------------------------------------------------------------------------------------------------------------------------------------------------------------------------------------------------------------------------------------------------------------------------------------------------------------------------------------------------------------------------------------------------------------------------------------------|-----------|
|                                                 |                          |                                     |                                               | Striatum                 | LST | AST | SMST | Caudate | Putamen | Thalamus | G. Pallidus | Hippocampus | Amygdala | Entorhinal | ACC | PCC | Uncus | DLPFC | MPFC |                             |                         | OFC | Insula | Temporal | Parietal                                                                                                                                                                                                                                                                                                                                                                                                                                                                                                                                                                                 | Occipital |
| <b>Studies of Dopamine (DA) synthesis in SZ</b> |                          |                                     |                                               |                          |     |     |      |         |         |          |             |             |          |            |     |     |       |       |      |                             |                         |     |        |          |                                                                                                                                                                                                                                                                                                                                                                                                                                                                                                                                                                                          |           |
| Reith <i>et al.</i> , 1994 (1)                  | [ <sup>18</sup> F]DOPA   | K <sub>i</sub> <sup>Cortex</sup>    | 5 chronic SZ (4 Rx-naïve + 1 Rx-free) > 13 HC | Y                        |     |     |      | Y       | Y       |          |             |             |          |            |     |     |       |       |      |                             |                         |     |        |          | <ul style="list-style-type: none"> <li>Ū between SZ and group of patients with temporal epilepsy with psychosis.</li> <li>Ū between HC and group of patients with temporal epilepsy without psychosis.</li> <li>-In SZ, mean illness duration was 14 +/- 9 years; and the 1 Rx-free had not received antipsychotics in &gt;3 years.</li> </ul>                                                                                                                                                                                                                                           | (2, 3)    |
| Dao-Castellana <i>et al.</i> , 1997 (4)         | [ <sup>18</sup> F]DOPA   | K <sub>i</sub> <sup>Occipital</sup> | 6 chronic SZ (2 Rx-naïve, 4 Rx-free) > 7 HC   |                          |     |     |      | Ū       | Ū       |          |             |             |          |            |     |     |       |       |      |                             |                         |     |        |          | <ul style="list-style-type: none"> <li>-K<sub>i</sub> variances in caudate and putamen were greater in SZ.</li> <li>-Not correlated with PANSS</li> </ul>                                                                                                                                                                                                                                                                                                                                                                                                                                | (2, 3)    |
| Hietala <i>et al.</i> , 1995 (5), 1999 (6)      | [ <sup>18</sup> F]DOPA   | K <sub>i</sub> <sup>Occipital</sup> | 10 SZ (Rx-naïve) > 13 HC                      | Y                        |     |     |      | Y*      | Y       |          |             |             |          |            |     |     |       |       |      |                             |                         |     |        |          | <ul style="list-style-type: none"> <li>*Y in SZ for left caudate was significant; right was not.</li> <li>-Asymmetry in caudate K<sub>i</sub> was seen in HC, but not SZ.</li> <li>-STR K<sub>i</sub> correlated with PANSS positive symptoms.</li> <li>-Left STR K<sub>i</sub> negatively correlated with depressive symptoms (by PANSS).</li> <li>-In putamen, K<sub>i</sub> highest in paranoid subtype, especially in paranoid patient experiencing florid persecutory AH during scan.</li> <li>-In patient with catatonia, striatal K<sub>i</sub> was lower than HC (5).</li> </ul> | (2, 3)    |
| Lindstrom <i>et al.</i> , 1999 (7)              | [ <sup>11</sup> C]L-DOPA | K <sub>i</sub> <sup>Occipital</sup> | 12 SZ (10 Rx-naïve + 2 Rx-free) > 10 HC       | Y                        |     |     |      | Y       | Y       |          |             |             |          |            | Ū   | Y   |       |       | Ū    |                             |                         |     |        |          | <ul style="list-style-type: none"> <li>-Trend for hemispheric lateralization in HC, but not SZ.</li> </ul>                                                                                                                                                                                                                                                                                                                                                                                                                                                                               | (2, 3, 8) |
| Meyer-Lindenberg <i>et al.</i> , 2002 (9)       | [ <sup>18</sup> F]DOPA   | K <sub>i</sub> <sup>Occipital</sup> | 6 SZ (Rx-free) > 6 HC                         | Y                        |     |     |      |         |         |          |             |             |          |            |     |     |       |       |      |                             |                         |     |        |          | <ul style="list-style-type: none"> <li>-Negative correlation with working memory (Wisconsin card sort) task-related activation (rCBF) in right DLPFC in SZ, but not in HC.</li> </ul>                                                                                                                                                                                                                                                                                                                                                                                                    | (2, 3)    |
| McGowan <i>et al.</i> , 2004 (10)               | [ <sup>18</sup> F]DOPA   | K <sub>i</sub> <sup>Occipital</sup> | 16 SZ (on Rx) > 12 HC                         | Y                        | Y   | Ū   |      |         |         |          |             |             |          |            |     | Ū   |       |       |      |                             |                         |     |        |          | <ul style="list-style-type: none"> <li>-K<sub>i</sub> in ACC correlated with performance on Stroop color-word test in both SZ and HC.</li> <li>-Semantic-category word production (by FAS cluster scores) did not correlate with LST K<sub>i</sub> in SZ, but did in HC.</li> </ul>                                                                                                                                                                                                                                                                                                      | (2)       |
| Kumakura <i>et al.</i> , 2007 (11)              | [ <sup>18</sup> F]DOPA   | K                                   | 8 SZ (3 Rx-naïve + Rx-free) > 15 HC           | Y                        | Y   |     |      | Y       | Y       |          |             |             |          | Y          |     |     |       |       |      |                             |                         |     | Y      |          | <ul style="list-style-type: none"> <li>-K is "K<sub>in</sub><sup>app</sup>" corrected for K<sub>loss</sub>, using cerebellum as reference.</li> <li>-In all VOIs of SZ, K was 20-50% greater and K<sub>loss</sub> was 75-90% greater than in HC.</li> <li>-For all VOIs, no significant group differences in K<sub>in</sub><sup>app</sup>.</li> <li>-Significant negative correlation between V<sub>d</sub> in bilateral amygdala and PANSS positive score (<i>r</i> = -0.775; <i>p</i> = 0.024).</li> <li>-No significant correlations with PANSS negative scores.</li> </ul>           | (2, 3, 8) |
| Nozaki <i>et al.</i> , 2009 (12)                | [ <sup>11</sup> C]L-DOPA | K <sub>i</sub> <sup>Occipital</sup> | 18 SZ (14 Rx-naïve + 4 Rx-free) > 20 HC       |                          |     |     |      | Y       | Ū       | Ū        |             |             |          | Ū          | Ū   |     |       |       |      | Ū                           |                         |     |        |          | <ul style="list-style-type: none"> <li>Y in SZ in left caudate only.</li> <li>-K<sub>i</sub> in thalamus correlated with PANSS total score.</li> <li>-K<sub>i</sub> in right temporal cortex correlated with PANSS positive score.</li> </ul>                                                                                                                                                                                                                                                                                                                                            | (2, 3, 8) |

| Publication                                                     | Tracer/ Challenge                                                            | Measure                       | Sample                                                                                                | Results by Brain Region: |     |     |      |         |         |          |             |             |          |            |     |     |       |       |      | Reported Correlates / Notes | Meta-Analysis Inclusion |     |        |          |          |                                                                                                                                                                                                                                                                                                                                                                                                                                                          |                                                                                                                                                                                                                                                                                                                                                                                                                                                                                                                                                                   |        |
|-----------------------------------------------------------------|------------------------------------------------------------------------------|-------------------------------|-------------------------------------------------------------------------------------------------------|--------------------------|-----|-----|------|---------|---------|----------|-------------|-------------|----------|------------|-----|-----|-------|-------|------|-----------------------------|-------------------------|-----|--------|----------|----------|----------------------------------------------------------------------------------------------------------------------------------------------------------------------------------------------------------------------------------------------------------------------------------------------------------------------------------------------------------------------------------------------------------------------------------------------------------|-------------------------------------------------------------------------------------------------------------------------------------------------------------------------------------------------------------------------------------------------------------------------------------------------------------------------------------------------------------------------------------------------------------------------------------------------------------------------------------------------------------------------------------------------------------------|--------|
|                                                                 |                                                                              |                               |                                                                                                       | Striatum                 | LST | AST | SMST | Caudate | Putamen | Thalamus | G. Pallidus | Hippocampus | Amygdala | Entorhinal | ACC | PCC | Uncus | DLPFC | MPFC |                             |                         | OFC | Insula | Temporal | Parietal | Occipital                                                                                                                                                                                                                                                                                                                                                                                                                                                | Midbrain                                                                                                                                                                                                                                                                                                                                                                                                                                                                                                                                                          |        |
| <b>Howes et al., 2009 (13)</b>                                  | [ <sup>18</sup> F]DOPA                                                       | K <sub>i</sub> <sup>cer</sup> | 7 SZ (4 Rx-naïve + 3 Rx-free) > 12 HC                                                                 | Y                        | U   | Y   | U    |         |         |          |             |             |          |            |     |     |       |       |      |                             |                         |     |        |          |          |                                                                                                                                                                                                                                                                                                                                                                                                                                                          | -In SZ, K <sub>i</sub> in STR did not correlate with PANSS, CAARMS, HAM-D or HAM-A scores.<br>-Also, in 24 CHR>HC, K <sub>i</sub> in AST was Y, and intermediate compared to SZ>HC. (See extension of UHR cohort in Howes et al., 2011 (14, 15) and Egerton et al., 2013 (16) below).                                                                                                                                                                                                                                                                             | (2, 3) |
| <b>Howes et al., 2013 (17)</b>                                  | [ <sup>18</sup> F]DOPA                                                       | K <sub>i</sub> <sup>cer</sup> | 29 SZ (5 Rx-naïve + 8 Rx-free + 16 on-Rx) > 29 HC                                                     | Y*                       | Y   | Y   | Y    |         |         |          |             |             |          |            |     |     |       |       |      |                             |                         |     |        |          | Y**      | **Y in STR even when restricted to 13 Rx-free SZ > 29 HC, and Y in STR when contrasted 16 SZ on-Rx > HC.<br>**Y in SN even when restricted to 13 Rx-free SZ > 29 HC, however U in SN when contrasted SZ on-Rx > HC.<br>-Nigral K <sub>i</sub> <sup>cer</sup> was proportional to STR K <sub>i</sub> <sup>cer</sup> in HC, but not in SZ.<br>-In SZ, nigral uptake was proportional to symptom severity.<br>-All SZ pts were on antipsychotic Rx (on-Rx). | -                                                                                                                                                                                                                                                                                                                                                                                                                                                                                                                                                                 |        |
| <b>Demjaha et al., 2012 (18)</b>                                | [ <sup>18</sup> F]DOPA                                                       | K <sub>i</sub> <sup>cer</sup> | 12 Rx-resistant SZ > 12 HC<br>12 Rx-responsive SZ > 12 HC<br>12 Rx-responsive SZ > 12 Rx-resistant SZ | U                        | U   | U   | U    |         |         |          |             |             |          |            |     |     |       |       |      |                             |                         |     |        |          |          |                                                                                                                                                                                                                                                                                                                                                                                                                                                          |                                                                                                                                                                                                                                                                                                                                                                                                                                                                                                                                                                   |        |
| <b>Howes et al., 2012 (2)</b>                                   | Meta-analysis of Striatal DA synthesis, Endogenous DA and DA release studies |                               | 17 studies                                                                                            |                          |     |     |      | U       | Y       |          |             |             |          |            |     |     |       |       |      |                             |                         |     |        |          |          |                                                                                                                                                                                                                                                                                                                                                                                                                                                          | -231 SZ and 251 HC<br>-Sample overlaps with that of Fusar-Poli et al., 2013b (3).                                                                                                                                                                                                                                                                                                                                                                                                                                                                                 |        |
| <b>Fusar-Poli et al., 2013b (3)</b>                             | Meta-analysis of Striatal DA synthesis studies                               |                               | 11 studies                                                                                            | Y                        |     |     |      | Y       | Y       |          |             |             |          |            |     |     |       |       |      |                             |                         |     |        |          |          |                                                                                                                                                                                                                                                                                                                                                                                                                                                          | -113 SZ and 131 HC<br>-In STR: SZ>HC by average of 14% ( <i>Hedges' g</i> =0.867, <i>p</i> <0.001) and was significantly Y'd in <i>all</i> studies with acutely psychotic pts.<br>-In caudate: SZ>HC with <i>Hedges' g</i> =0.569, <i>p</i> =0.005.<br>-In putamen: SZ>HC with <i>Hedges' g</i> =0.643, <i>p</i> =0.021.<br>-SZ sample included groups with varied mixes of Rx-free & on-Rx pts.<br>-Not moderated by pts' age, illness duration, psychotic symptoms, antipsychotic exposure, or gender.<br>-Sample overlaps with that of Howes et al., 2012 (2). |        |
| <b>Studies of DA synthesis in Clinical High Risk (CHR, UHR)</b> |                                                                              |                               |                                                                                                       |                          |     |     |      |         |         |          |             |             |          |            |     |     |       |       |      |                             |                         |     |        |          |          |                                                                                                                                                                                                                                                                                                                                                                                                                                                          |                                                                                                                                                                                                                                                                                                                                                                                                                                                                                                                                                                   |        |
| <b>Howes et al., 2009 (13)</b>                                  | [ <sup>18</sup> F]DOPA                                                       | K <sub>i</sub> <sup>cer</sup> | 24 UHR > 12 HC ("1 <sup>st</sup> cohort")                                                             | Y                        | U   | Y   | U    |         |         |          |             |             |          |            |     |     |       |       |      |                             |                         |     |        |          |          |                                                                                                                                                                                                                                                                                                                                                                                                                                                          | -Compared to 7 SZ>HC (same study, listed above, effect size=1.25), for 24 UHR>HC, K <sub>i</sub> in AST was also Y, and intermediate (effect size=0.75).<br>-In UHR, K <sub>i</sub> in STR correlated with severity of psychopathology (CAARMS & PANSS scores) and neuropsychological impairment (poor verbal fluency performance), but not with severity of anxiety or depressive symptoms (HAM-A and HAM-D scores). Similar CAARMS & PANSS score correlations were observed for K <sub>i</sub> in AST and SMST, but not for LST.                                | (2, 3) |
| <b>Howes et al., 2011 (14, 15)</b>                              | [ <sup>18</sup> F]DOPA                                                       | K <sub>i</sub> <sup>cer</sup> | 9 UHR-transitioned > 29 HC                                                                            | Y                        | U   | Y   | U    |         |         |          |             |             |          |            |     |     |       |       |      |                             |                         |     |        |          |          |                                                                                                                                                                                                                                                                                                                                                                                                                                                          | -In UHR-transitioned ( <i>i.e.</i> UHR who transitioned to psychosis within 2 years after scan) > HC, effect size was 1.18 in STR and 1.24 in AST.<br>-For 15 UHR-non-transitioned > 29 HC, U in K <sub>i</sub> <sup>cer</sup> in STR or any subregions.                                                                                                                                                                                                                                                                                                          | -      |

| Publication                           | Tracer/ Challenge                                               | Measure                                | Sample                                                                                            | Results by Brain Region: |     |     |      |         |         |          |             |             |          |            |     |                                    |       |       |      | Reported Correlates / Notes | Meta-Analysis Inclusion |     |        |          |          |                                                                                                                                                                                                                                                                                                                                                     |                                                                                                                                                                                                                                                                                                                                                                                                                                                                           |   |
|---------------------------------------|-----------------------------------------------------------------|----------------------------------------|---------------------------------------------------------------------------------------------------|--------------------------|-----|-----|------|---------|---------|----------|-------------|-------------|----------|------------|-----|------------------------------------|-------|-------|------|-----------------------------|-------------------------|-----|--------|----------|----------|-----------------------------------------------------------------------------------------------------------------------------------------------------------------------------------------------------------------------------------------------------------------------------------------------------------------------------------------------------|---------------------------------------------------------------------------------------------------------------------------------------------------------------------------------------------------------------------------------------------------------------------------------------------------------------------------------------------------------------------------------------------------------------------------------------------------------------------------|---|
|                                       |                                                                 |                                        |                                                                                                   | Striatum                 | LST | AST | SMST | Caudate | Putamen | Thalamus | G. Pallidus | Hippocampus | Amygdala | Entorhinal | ACC | PCC                                | Uncus | DLPFC | MPFC |                             |                         | OFC | Insula | Temporal | Parietal | Occipital                                                                                                                                                                                                                                                                                                                                           | Midbrain                                                                                                                                                                                                                                                                                                                                                                                                                                                                  |   |
| Howes et al., 2011 (14, 15)           | [ <sup>18</sup> F]DOPA                                          | K <sub>i</sub> <sup>cer</sup>          | 9 UHR-transitioned > 15 UHR-non-transitioned                                                      | Y                        | U   | Y   | U    |         |         |          |             |             |          |            |     |                                    |       |       |      |                             |                         |     |        |          |          |                                                                                                                                                                                                                                                                                                                                                     | -Y ΔK <sub>i</sub> <sup>cer</sup> in SMST in UHR-transitioned (compared to UHR-non-transitioned) and remained significant after excluding 2 UHR-transitioned pts who were antipsychotic-treated before the 2 <sup>nd</sup> scan.                                                                                                                                                                                                                                          | - |
| Egerton et al., 2013 (16)             | [ <sup>18</sup> F]DOPA                                          | K <sub>i</sub> <sup>cer</sup>          | 26 UHR > 20 HC ("2 <sup>nd</sup> cohort")<br>50 UHR > 32 HC (Combined cohorts from (16) and (13)) | Y                        | U   | Y   | U    |         |         |          |             |             |          |            |     |                                    |       |       |      |                             |                         |     |        |          |          |                                                                                                                                                                                                                                                                                                                                                     | -In UHR, no correlates with prodromal symptoms severity (CAARMS total score) or SZ symptoms (PANSS total score).<br>-In overlapping sample of 18 unmedicated UHR > 18 HC examined by Roiser et al., 2013 (19): In UHR, K <sub>i</sub> <sup>cer</sup> in AST was negatively correlated with fMRI-measured hippocampal responses to irrelevant stimulus features ( <i>i.e.</i> Aberrant neural reward prediction signals). Whereas, these were positively correlated in HC. | - |
| Allen et al., 2012 (20)               | [ <sup>18</sup> F]DOPA                                          | K <sub>i</sub> <sup>cer</sup>          | 5 UHR-transitioned > 16 UHR-non-transitioned                                                      |                          |     |     |      |         |         |          |             |             |          |            |     |                                    |       |       |      |                             |                         |     |        |          | Y        | -2-year follow-up: 5/21 transitioned to psychosis.<br>-Small sample size and 1 UHR who transitioned and 2 UHR who did not transition were getting antipsychotics at low doses (<1.5 mg haloperidol equivalents/day) or other medications.<br>-Midbrain ROI also included pons.<br>-Sample overlaps and extends that of Howes et al., 2011 (14, 15). | -                                                                                                                                                                                                                                                                                                                                                                                                                                                                         |   |
| <b>Studies of Endogenous DA in SZ</b> |                                                                 |                                        |                                                                                                   |                          |     |     |      |         |         |          |             |             |          |            |     | (Also see meta-analysis (2) above) |       |       |      |                             |                         |     |        |          |          |                                                                                                                                                                                                                                                                                                                                                     |                                                                                                                                                                                                                                                                                                                                                                                                                                                                           |   |
| Abi-Dargham et al., 2000 (21)         | [ <sup>123</sup> I]IBZM/ α-MPT                                  | ΔBP <sub>ND</sub>                      | 18 SZ (8 Rx-naïve + 10 Rx-free) > 18 HC                                                           | Y                        |     |     |      |         |         |          |             |             |          |            |     |                                    |       |       |      |                             |                         |     |        |          |          | Y baseline synaptic DA in striatum predicted reduction of positive-symptoms with antipsychotic.<br>-In SZ, 8 first-episode Rx-naïve and 10 Rx-free, previously-treated pts with chronic SZ experiencing illness exacerbation.                                                                                                                       | (2)                                                                                                                                                                                                                                                                                                                                                                                                                                                                       |   |
| Abi-Dargham et al., 2009 (22)         | [ <sup>123</sup> I]IBZM/ α-MPT<br>[ <sup>123</sup> I]IBZM/ Amph | ΔBP <sub>ND</sub><br>ΔBP <sub>ND</sub> | 6 SZ (Rx-naïve) > 8 HC                                                                            | Y<br>Y                   |     |     |      |         |         |          |             |             |          |            |     |                                    |       |       |      |                             |                         |     |        |          |          | -In Rx-naïve SZ, ΔBP <sub>ND</sub> in response to depletion correlated with ΔBP <sub>ND</sub> in response to amph-challenge.                                                                                                                                                                                                                        | (2)                                                                                                                                                                                                                                                                                                                                                                                                                                                                       |   |
| Kegeles et al., 2010 (23)             | [ <sup>11</sup> C]Rac/ α-MPT                                    | ΔBP <sub>ND</sub>                      | 18 SZ (6 Rx-naïve + 12 Rx-free) > 18 HC                                                           | U                        | U   | Y   | U    |         |         |          |             |             |          |            |     |                                    |       |       |      |                             |                         |     |        |          |          | -Within AST, Y was specific to rostral caudate.<br>-In SZ, Y in LST inversely correlated with severity of baseline negative symptoms.                                                                                                                                                                                                               | (2)                                                                                                                                                                                                                                                                                                                                                                                                                                                                       |   |
| <b>Studies of DA Release in SZ</b>    |                                                                 |                                        |                                                                                                   |                          |     |     |      |         |         |          |             |             |          |            |     | (Also see meta-analysis (2) above) |       |       |      |                             |                         |     |        |          |          |                                                                                                                                                                                                                                                                                                                                                     |                                                                                                                                                                                                                                                                                                                                                                                                                                                                           |   |
| Laruelle et al., 1996 (24)            | [ <sup>123</sup> I]IBZM/ Amph                                   | ΔBP <sub>ND</sub>                      | 15 SZ (Rx-free) > 15 HC                                                                           | Y                        |     |     |      |         |         |          |             |             |          |            |     |                                    |       |       |      |                             |                         |     |        |          |          | -In SZ, greater STR ΔBP <sub>ND</sub> variance ( <i>ratio</i> =3.85, <i>p</i> <0.02)<br>-In SZ, STR ΔBP <sub>ND</sub> correlated with transient amph-induced worsening of positive, but not negative symptoms (PANSS).<br>U between SZ and HC in amph-induced behavioral activation scores (by AIRS).                                               | (2)                                                                                                                                                                                                                                                                                                                                                                                                                                                                       |   |
| Breier et al., 1997 (25)              | [ <sup>11</sup> C]Rac/ Amph                                     | ΔBP <sub>ND</sub>                      | 11 SZ (6 Rx-naïve + 5 Rx-free) > 12 HC                                                            | Y                        |     |     |      |         |         |          |             |             |          |            |     |                                    |       |       |      |                             |                         |     |        |          |          | U between STR ΔBP <sub>ND</sub> in Rx-naïve and Rx-free.<br>-STR ΔBP <sub>ND</sub> correlated with ΔBPRS scores in SZ; not in HC.                                                                                                                                                                                                                   | (2)                                                                                                                                                                                                                                                                                                                                                                                                                                                                       |   |
| Abi-Dargham et al., 1998 (26)         | [ <sup>123</sup> I]IBZM/ Amph                                   | ΔBP <sub>ND</sub>                      | 15 SZ (2 Rx-naïve + 13 Rx-free) > 15 HC                                                           | Y                        |     |     |      |         |         |          |             |             |          |            |     |                                    |       |       |      |                             |                         |     |        |          |          | -In SZ, STR ΔBP <sub>ND</sub> correlated with Y transient amph-induced positive symptoms, but not with Δ in negative symptoms.                                                                                                                                                                                                                      | (2)                                                                                                                                                                                                                                                                                                                                                                                                                                                                       |   |

| Publication                                                                              | Tracer/ Challenge                     | Measure          | Sample                                                              | Results by Brain Region: |     |     |      |         |         |          |             |             |          |            |     |     |       |       |      |     | Reported Correlates / Notes | Meta-Analysis Inclusion |        |          |          |           |          |  |  |                                                                                                                                                                                                                                                                                                                                                                                |                                                                                                                                                                                        |                                                                                                                                                                                           |  |
|------------------------------------------------------------------------------------------|---------------------------------------|------------------|---------------------------------------------------------------------|--------------------------|-----|-----|------|---------|---------|----------|-------------|-------------|----------|------------|-----|-----|-------|-------|------|-----|-----------------------------|-------------------------|--------|----------|----------|-----------|----------|--|--|--------------------------------------------------------------------------------------------------------------------------------------------------------------------------------------------------------------------------------------------------------------------------------------------------------------------------------------------------------------------------------|----------------------------------------------------------------------------------------------------------------------------------------------------------------------------------------|-------------------------------------------------------------------------------------------------------------------------------------------------------------------------------------------|--|
|                                                                                          |                                       |                  |                                                                     | Striatum                 | LST | AST | SMST | Caudate | Putamen | Thalamus | G. Pallidus | Hippocampus | Amygdala | Entorhinal | ACC | PCC | Uncus | DLPFC | MPFC | OFC |                             |                         | Insula | Temporal | Parietal | Occipital | Midbrain |  |  |                                                                                                                                                                                                                                                                                                                                                                                |                                                                                                                                                                                        |                                                                                                                                                                                           |  |
| Laruelle et al., 1999 (27)                                                               | [ <sup>123</sup> I]IBZM/ Amph         | $\Delta BP_{ND}$ | 34 SZ (7 Rx-naïve + 27 Rx-free) > 26 HC (sample extended from (24)) | Y                        |     |     |      |         |         |          |             |             |          |            |     |     |       |       |      |     |                             |                         |        |          |          |           |          |  |  | -In SZ, STR $\Delta BP_{ND}$ correlated with amph-induced Y in positive symptoms (by PANSS).<br>-Severity of negative symptoms at baseline predicted amph-induced improvement in negative symptoms (by PANSS), but did not predict $\Delta BP_{ND}$ .<br>- STR $\Delta BP_{ND}$ correlated with amph-induced improvement in negative symptoms, but was likely driven by 2 pts. | (2)                                                                                                                                                                                    |                                                                                                                                                                                           |  |
| Pogarell et al., 2012 (28)                                                               | [ <sup>123</sup> I]IBZM/ Amph         | $\Delta BP_{ND}$ | 8 SZ (Rx-free x7 days) > 7 HC                                       | Y                        |     |     |      |         |         |          |             |             |          |            |     |     |       |       |      |     |                             |                         |        |          |          |           |          |  |  | -Trends for STR $\Delta BP_{ND}$ association with symptoms in SZ; small sample size                                                                                                                                                                                                                                                                                            |                                                                                                                                                                                        |                                                                                                                                                                                           |  |
| Mizrahi et al., 2012 (29)                                                                | [ <sup>11</sup> C]PHNO/ Stress        | $\Delta BP_{ND}$ | 10 SZ (Rx-naïve) > 12 HC                                            | Y                        | U   | Y   | Y    |         |         |          |             |             |          |            |     |     |       |       |      |     |                             |                         |        |          |          |           |          |  |  | -Also compared with 12 CHR: Y AST $\Delta BP_{ND}$ in CHR and SZ, compared to HC; while U between CHR and SZ.                                                                                                                                                                                                                                                                  |                                                                                                                                                                                        |                                                                                                                                                                                           |  |
| Slifstein et al., 2015 (30)                                                              | [ <sup>11</sup> C]FLB457/ Amph        | $\Delta BP_{ND}$ | 20 SZ (6 Rx-naïve and 14 Rx-free) > 21 HC                           |                          |     |     |      |         |         |          |             |             |          |            |     |     |       |       |      |     |                             |                         |        |          |          |           |          |  |  | -In both SZ and HC, $\Delta BP_{ND}$ in DLPFC correlated with working-memory-related BOLD activation of DLPFC.                                                                                                                                                                                                                                                                 |                                                                                                                                                                                        |                                                                                                                                                                                           |  |
| <b>Studies of DA Release in SZ or CHR with Substance use</b>                             |                                       |                  |                                                                     |                          |     |     |      |         |         |          |             |             |          |            |     |     |       |       |      |     |                             |                         |        |          |          |           |          |  |  |                                                                                                                                                                                                                                                                                                                                                                                |                                                                                                                                                                                        |                                                                                                                                                                                           |  |
| Thompson et al., 2013 (31)                                                               | [ <sup>11</sup> C]Rac/ Amph           | $\Delta BP_{ND}$ | 11 SZ+SubsDep > 15 HC                                               |                          |     |     |      |         |         |          |             |             |          |            |     |     |       |       |      |     |                             |                         |        |          |          |           |          |  |  |                                                                                                                                                                                                                                                                                                                                                                                | -In SZ participants, $\Delta BP_{ND}$ in pre-DCA and LST associated with change in positive symptoms (PANSS) after amph.<br>-All were unmedicated and substance-free. 2 were Rx-naïve. |                                                                                                                                                                                           |  |
| Mizrahi et al., 2014 (32)                                                                | [ <sup>11</sup> C]PHNO/ Stress        | $\Delta BP_{ND}$ | 12 CHR+Cannabis (CHR-CU) > 12 CHR                                   |                          |     |     |      |         |         |          |             |             |          |            |     |     |       |       |      |     |                             |                         |        |          |          |           |          |  |  |                                                                                                                                                                                                                                                                                                                                                                                | -Stress decreased $\Delta BP_{ND}$ in CHR; whereas stress increased $\Delta BP_{ND}$ in CHR-CU.                                                                                        |                                                                                                                                                                                           |  |
| <b>Studies of Vesicular monoamine transporter-2 (VMAT2) in SZ</b>                        |                                       |                  |                                                                     |                          |     |     |      |         |         |          |             |             |          |            |     |     |       |       |      |     |                             |                         |        |          |          |           |          |  |  |                                                                                                                                                                                                                                                                                                                                                                                |                                                                                                                                                                                        |                                                                                                                                                                                           |  |
| Taylor et al., 2000 (33)                                                                 | [ <sup>11</sup> C]DTBZ                | $BP_{ND}$        | 12 SZ (on-Rx) > 12 matched HC                                       | U                        | U   | U   | U    | U       | U       | U        |             |             |          |            |     |     |       |       |      |     |                             |                         |        |          |          |           |          |  |  |                                                                                                                                                                                                                                                                                                                                                                                |                                                                                                                                                                                        |                                                                                                                                                                                           |  |
| Zubieta et al., 2001 (34)                                                                | [ <sup>11</sup> C]DTBZ                | $BP_{ND}$        | 12 SZ (on-Rx) > 15 matched HC                                       |                          |     |     |      |         |         |          |             |             |          |            |     |     |       |       |      |     |                             |                         |        |          |          |           |          |  |  |                                                                                                                                                                                                                                                                                                                                                                                | -Also contrasted with group of 15 euthymic pts with bipolar I disorder with history of psychotic features, which had Y $BP_{ND}$ in thalamus and ventral midbrain                      |                                                                                                                                                                                           |  |
| <b>Studies of Dopamine transporter (DAT) in SZ</b>                                       |                                       |                  |                                                                     |                          |     |     |      |         |         |          |             |             |          |            |     |     |       |       |      |     |                             |                         |        |          |          |           |          |  |  |                                                                                                                                                                                                                                                                                                                                                                                |                                                                                                                                                                                        |                                                                                                                                                                                           |  |
| Laruelle et al., 2000 (35)                                                               | [ <sup>123</sup> I]β-CIT              | $BP_{ND}$        | 24 SZ (4 Rx-free >2 wks, 4 Rx-free <2 wks, and 16 on-Rx) > 22 HC    | U                        |     |     |      |         |         |          |             |             |          |            |     |     |       |       |      |     |                             |                         |        |          |          |           |          |  |  |                                                                                                                                                                                                                                                                                                                                                                                | -DAT levels did not correlate with amph-induced DA release (measured in same cohort using [ <sup>123</sup> I]IBZM).                                                                    | (2, 36)                                                                                                                                                                                   |  |
| Arakawa et al., 2009 (37)                                                                | [ <sup>11</sup> C]PE2I                | $BP_{ND}$        | 8 SZ (6 Rx-Naïve + 2 Rx-Free) > 12 HC                               | U                        |     |     |      |         |         |          |             |             |          |            |     |     |       |       |      |     |                             |                         |        |          |          |           |          |  |  |                                                                                                                                                                                                                                                                                                                                                                                | -In SZ, $BP_{ND}$ in thalamus correlated with total, positive and negative PANSS scores.                                                                                               | (2, 36)                                                                                                                                                                                   |  |
| Howes et al., 2012 (2)                                                                   | Meta-analysis of Striatal DAT studies |                  | 11 studies                                                          | U                        |     |     |      |         |         |          |             |             |          |            |     |     |       |       |      |     |                             |                         |        |          |          |           |          |  |  |                                                                                                                                                                                                                                                                                                                                                                                | -152 SZ and 132 H ( $d=-0.34$ , $p=0.10$ ).<br>-Significant sample overlaps with that in Fusar-Poli et al., 2013a (36).                                                                |                                                                                                                                                                                           |  |
| Fusar-Poli et al., 2013a (36)                                                            | Meta-analysis of Striatal DAT studies |                  | 13 studies                                                          | U                        |     |     |      |         |         |          |             |             |          |            |     |     |       |       |      |     |                             |                         |        |          |          |           |          |  |  |                                                                                                                                                                                                                                                                                                                                                                                |                                                                                                                                                                                        | -202 SZ and 147 HC (Hedges' $g=-0.244$ , $p=0.269$ ).<br>-Significant sample overlaps with that in Howes et al., 2012 (2).<br>-SZ sample was mixed with pts on-Rx, Rx-naïve, and Rx-free. |  |
| <b>Studies of Dopamine-D<sub>2/3</sub> receptor (D<sub>2/3</sub>) availability in SZ</b> |                                       |                  |                                                                     |                          |     |     |      |         |         |          |             |             |          |            |     |     |       |       |      |     |                             |                         |        |          |          |           |          |  |  |                                                                                                                                                                                                                                                                                                                                                                                |                                                                                                                                                                                        |                                                                                                                                                                                           |  |

| Publication                                                                          | Tracer/ Challenge                                                       | Measure                              | Sample                                                                         | Results by Brain Region: |     |     |      |         |         |          |             |             |          |            |     |     |       |       |      |     | Reported Correlates / Notes | Meta-Analysis Inclusion |        |          |          |           |                                                                                                                                                                                                                                                                                                                                                                                                                                                                                                                                                                                                      |   |
|--------------------------------------------------------------------------------------|-------------------------------------------------------------------------|--------------------------------------|--------------------------------------------------------------------------------|--------------------------|-----|-----|------|---------|---------|----------|-------------|-------------|----------|------------|-----|-----|-------|-------|------|-----|-----------------------------|-------------------------|--------|----------|----------|-----------|------------------------------------------------------------------------------------------------------------------------------------------------------------------------------------------------------------------------------------------------------------------------------------------------------------------------------------------------------------------------------------------------------------------------------------------------------------------------------------------------------------------------------------------------------------------------------------------------------|---|
|                                                                                      |                                                                         |                                      |                                                                                | Striatum                 | LST | AST | SMST | Caudate | Putamen | Thalamus | G. Pallidus | Hippocampus | Amygdala | Entorhinal | ACC | PCC | Uncus | DLPFC | MPFC | OFC |                             |                         | Insula | Temporal | Parietal | Occipital | Midbrain                                                                                                                                                                                                                                                                                                                                                                                                                                                                                                                                                                                             |   |
| <b>Howes <i>et al.</i>, 2012 (2)</b>                                                 | Meta-analysis of Striatal D <sub>2/3</sub> availability studies         |                                      | 22 studies                                                                     | Ÿ*                       |     |     |      | Ű       | Ÿ*      |          |             |             |          |            |     |     |       |       |      |     |                             |                         |        |          |          |           | 337 SZ and 324 HC<br>For striatum (22 studies): Ÿ* in SZ (effect size $d=0.26$ , $p=0.049$ ) *Small and inconsistent finding, differences only significant in studies with pts who had received butyrophenone radiotracers. Also, was not significant when included only those studies with Rx-naïve patients.<br>For striatum (14 studies that used a benzamide tracer): SZŰ HC ( $d=0.13$ , $p=0.44$ ).<br>For caudate (8 studies): SZŰ HC ( $d=0.37$ , $p=0.12$ ).<br>For putamen (8 studies): Ÿ in SZ ( $d=0.51$ , $p=0.007$ ), although this included studies irrespective of radiotracer used. |   |
| <b>Kambeitz <i>et al.</i>, 2014 (8)</b>                                              | Meta-analyses of studies of Extrastriatal D <sub>2/3</sub> availability |                                      | Thalamus: 8 studies<br>Temporal: 6 studies<br>Substantia Nigra (SN): 5 studies |                          |     |     |      |         |         | Ű        |             |             |          |            |     |     |       |       |      |     | Ű                           |                         |        | Ű        |          |           | -For Thalamus: 138 SZ and 126 HC (8 studies), $d=-0.32$ , $p=0.07$ .<br>-For Temporal Cortex: 84 SZ and 86 HC (6 studies), $d=-0.23$ , $p=0.1$ .<br>-For SN, 61 SZ and 72 HC (5 studies), $d=0.04$ , $p=0.9$ . Also no effect when excluded the one study of Rx-naïve SZ.                                                                                                                                                                                                                                                                                                                            |   |
| <b>Nakajima <i>et al.</i>, 2015 (38)</b>                                             | [ <sup>11</sup> C]Rac                                                   | BP <sub>ND</sub>                     | 10 SZ(age50*) > 10 HC(age48*)                                                  | Ű                        | Ű   |     | Ű    | Ű       | Ű       |          |             |             |          |            |     |     |       |       |      |     |                             |                         |        |          |          |           | -No correlations with PANSS total or subscale scores.<br>-Of 10 SZ, 4 were Rx-naïve; all were Rx-free>3mo and no exposures to depot antipsychotic Rx.<br>-In SZ, no difference in BP <sub>ND</sub> between Rx-naïve and Rx-free, although subgroups were not sex-matched.                                                                                                                                                                                                                                                                                                                            | - |
| <b>Slifstein <i>et al.</i>, 2015 (30)</b>                                            | [ <sup>11</sup> C]FLB457                                                | BP <sub>ND</sub>                     | 20 SZ (6 Rx-naïve + 14 Rx-free) > 21 HC                                        |                          |     |     |      |         |         | Ű        | Ű           | Ű           | Ű        | Ű          | Ű   | Ű   | Ű     | Ű     | Ű    | Ű   | Ű                           | Ű                       | Ű      | Ű        | Ű        | Ű         | -Within SZ, BP <sub>ND</sub> in Rx-Naïve > Rx-Free.                                                                                                                                                                                                                                                                                                                                                                                                                                                                                                                                                  | - |
| <b>Studies of Dopamine-D<sub>1</sub> receptor (D<sub>1</sub>) availability in SZ</b> |                                                                         |                                      |                                                                                |                          |     |     |      |         |         |          |             |             |          |            |     |     |       |       |      |     |                             |                         |        |          |          |           |                                                                                                                                                                                                                                                                                                                                                                                                                                                                                                                                                                                                      |   |
| <b>Okubo <i>et al.</i>, 1997 (39)</b>                                                | [ <sup>11</sup> C]SCH23390                                              | BP <sub>ND</sub>                     | 17 SZ (10 Rx-Naïve, 7 Rx-Free>2wks) > 18 HC                                    | Ű                        |     |     |      |         |         |          |             |             |          |            |     |     |       |       |      |     |                             |                         |        |          |          |           | Ű related to severity of negative symptoms (BPRS) and poor performance in Wisconsin Card Sort Test.                                                                                                                                                                                                                                                                                                                                                                                                                                                                                                  | - |
| <b>Karlsson <i>et al.</i>, 2002 (40)</b>                                             | [ <sup>11</sup> C]SCH23390                                              | BP                                   | 10 SZ (Rx-Naïve, first episode) > 10 HC                                        |                          |     |     |      |         |         | Ű        | Ű           |             |          |            |     |     |       |       |      |     |                             |                         |        |          |          |           | -B <sub>max</sub> in right frontal cortex associated with negative symptoms (BPRS).                                                                                                                                                                                                                                                                                                                                                                                                                                                                                                                  | - |
| <b>Abi-Dargham <i>et al.</i>, 2002 (41)</b>                                          | [ <sup>11</sup> C]NNC112                                                | BP                                   | 16 SZ (7 Rx-Naïve, 9 Rx-free) > 16 HC                                          |                          | Ű   | Ű   | Ű    |         |         | Ű        | Ű           | Ű           | Ű        |            |     |     |       |       |      |     |                             |                         |        |          |          |           | Ÿ BP in DLPFC correlated with working memory deficits (n-back) in SZ and HC.<br>Rx-naïve were in 1st episode and Rx-free were chronic pts<br>Entorhinal ROI was "parahippocampal gyrus"                                                                                                                                                                                                                                                                                                                                                                                                              | - |
| <b>Abi-Dargham <i>et al.</i>, 2012 (42)</b>                                          | [ <sup>11</sup> C]NNC112                                                | BP <sub>ND</sub> and BP <sub>p</sub> | 12 SZ (Rx-Naïve) > 24 HC<br>13 SZ (Rx-Free) > 24 HC                            |                          | Ű   | Ű   | Ű    |         |         |          |             |             |          |            |     |     |       |       |      |     |                             |                         |        |          |          |           | Ÿ in cortical ROIs in Rx-naïve SZ, but not Rx-free. Rx-free interval was associated with cortical BP <sub>p</sub><br>-Did not replicate first cohort's (41) association with working memory deficits.                                                                                                                                                                                                                                                                                                                                                                                                | - |
| <b>Study of D<sub>1</sub> availability in Schizotypal Personality Disorder</b>       |                                                                         |                                      |                                                                                |                          |     |     |      |         |         |          |             |             |          |            |     |     |       |       |      |     |                             |                         |        |          |          |           |                                                                                                                                                                                                                                                                                                                                                                                                                                                                                                                                                                                                      |   |
| <b>Thompson <i>et al.</i>, 2014 (43)</b>                                             | [ <sup>11</sup> C]NNC112                                                | BP <sub>ND</sub> and BP <sub>F</sub> | 18 Schizotypal personality disorder (SPD) > 21 HC                              |                          | Ű   | Ű   | Ű    |         |         |          |             |             |          |            |     |     |       |       |      |     |                             |                         |        |          |          |           | -BP <sub>F</sub> and BP <sub>p</sub> in MPFC negatively related to PASAT (paced auditory serial addition test) performance, but BP was not related to 2-back performance.<br>-SPD were all unmedicated.<br>-Trends of Ÿ BP <sub>F</sub> and BP <sub>ND</sub> for SPD in LST, but no other striatal subregions. Also trend for Ÿ BP <sub>F</sub> for SPD in whole striatum, but not BP <sub>ND</sub> .                                                                                                                                                                                                | - |

**Note:** "Ÿ" indicates that the measure is significantly higher in SZ, compared to HC. In all cases, this refers to the dopamine-related interpretation of the measure. For BP<sub>ND</sub>, Ÿ indicates binding potential in SZ is higher than in HC. For ΔBP<sub>ND</sub>, Ÿ indicates greater displacement (i.e. greater change in BP<sub>ND</sub> with challenge, compared to baseline) in SZ than in

HC. For  $K_i^{cer}$ ,  $\dot{Y}$  denotes higher uptake ratio (i.e. greater DA synthesis and storage capacity) in SZ than in HC. “ $\beta$ ” indicates significantly lower, and “ $\dot{U}$ ” indicates no significant group difference.

**Abbreviations:** Participants (pts); Healthy control participants (HC); Participants with schizophrenia (SZ); Participants with schizophrenia and comorbid substance dependence (SZ+SubsDep); Participants at ultra-high risk for psychosis (UHR) or clinical high risk for schizophrenia (CHR), as determined using clinical high risk criteria for psychosis (44); Taking antipsychotic medication at time of study (on-Rx); Antipsychotic-naïve (Rx-naïve); Antipsychotic-free >3 weeks, unless otherwise noted (Rx-free); Schizotypal personality disorder (SPD); Dopamine (DA); Dopamine-D<sub>1</sub> receptor (D<sub>1</sub>); Dopamine-D<sub>2</sub> receptor (D<sub>2</sub>); Dopamine-D<sub>2</sub> and -D<sub>3</sub> receptors (D<sub>2/3</sub>); Vesicular monoamine transporter, type 2 (VMAT2); Dopamine transporter (DAT); [<sup>11</sup>C]Raclopride ([<sup>11</sup>C]Rac); Binding potential (BP); Binding potential relative to non-displaceable compartment (BP<sub>ND</sub>); Percent change in binding potential ( $\Delta BP_{ND}$ ); Influx rate constant (K<sub>i</sub>) and, when concentration in a reference region (such as cerebellum, cortex, or occipital cortex) is used as the input for the plasma concentration (K<sub>i</sub><sup>cer</sup>, K<sub>i</sub><sup>Cortex</sup> or K<sub>i</sub><sup>Occipital</sup>, respectively); Amphetamine (Amph); Region of interest (ROI); Voxel of interest (VOI); Striatum (STR); Limbic striatum (LST); Associative striatum (AST); Sensorimotor striatum (SMST); Precommissural dorsal caudate (Pre-DCA); Globus pallidus (G. Pallidus); Anterior cingulate cortex (ACC); Posterior cingulate cortex (PCC); Dorsolateral prefrontal cortex (DLPFC); Medial prefrontal cortex (MPFC); Orbitofrontal cortex (OFC); Substantia nigra (SN); Ventral tegmental area (VTA); Comprehensive Assessment of At-Risk Mental States (CAARMS); Positive And Negative Syndrome Scale (PANSS); Brief Psychiatric Rating Scale (BPRS); Amphetamine Interview Rating Scale (AIRS); Hamilton Depression Rating Scale (HAM-D) and Hamilton Anxiety Rating Scale (HAM-A).

## Supplemental References

1. Reith J, Benkelfat C, Sherwin A, Yasuhara Y, Kuwabara H, Andermann F, et al. (1994): Elevated dopa decarboxylase activity in living brain of patients with psychosis. *Proceedings of the National Academy of Sciences of the United States of America*. 91:11651-11654.
2. Howes OD, Kambeitz J, Kim E, Stahl D, Slifstein M, Abi-Dargham A, et al. (2012): The nature of dopamine dysfunction in schizophrenia and what this means for treatment. *Arch Gen Psychiatry*. 69:776-786.
3. Fusar-Poli P, Meyer-Lindenberg A (2013): Striatal presynaptic dopamine in schizophrenia, part II: meta-analysis of [(18)F/(11)C]-DOPA PET studies. *Schizophrenia bulletin*. 39:33-42.
4. Dao-Castellana MH, Paillere-Martinot ML, Hantraye P, Attar-Levy D, Remy P, Crouzel C, et al. (1997): Presynaptic dopaminergic function in the striatum of schizophrenic patients. *Schizophrenia research*. 23:167-174.
5. Hietala J, Syvalahti E, Vuorio K, Rakkolainen V, Bergman J, Haaparanta M, et al. (1995): Presynaptic dopamine function in striatum of neuroleptic-naive schizophrenic patients. *Lancet*. 346:1130-1131.
6. Hietala J, Syvalahti E, Vilkmann H, Vuorio K, Rakkolainen V, Bergman J, et al. (1999): Depressive symptoms and presynaptic dopamine function in neuroleptic-naive schizophrenia. *Schizophrenia research*. 35:41-50.
7. Lindstrom LH, Gefvert O, Hagberg G, Lundberg T, Bergstrom M, Hartvig P, et al. (1999): Increased dopamine synthesis rate in medial prefrontal cortex and striatum in schizophrenia indicated by L-(beta-11C) DOPA and PET. *Biological psychiatry*. 46:681-688.
8. Kambeitz J, Abi-Dargham A, Kapur S, Howes OD (2014): Alterations in cortical and extrastriatal subcortical dopamine function in schizophrenia: systematic review and meta-analysis of imaging studies. *The British journal of psychiatry : the journal of mental science*. 204:420-429.
9. Meyer-Lindenberg A, Miletich RS, Kohn PD, Esposito G, Carson RE, Quarantelli M, et al. (2002): Reduced prefrontal activity predicts exaggerated striatal dopaminergic function in schizophrenia. *Nature neuroscience*. 5:267-271.
10. McGowan S, Lawrence AD, Sales T, Quedsted D, Grasby P (2004): Presynaptic dopaminergic dysfunction in schizophrenia: a positron emission tomographic [18F]fluorodopa study. *Arch Gen Psychiatry*. 61:134-142.
11. Kumakura Y, Cumming P, Vernaleken I, Buchholz HG, Siessmeier T, Heinz A, et al. (2007): Elevated [18F]fluorodopamine turnover in brain of patients with



- schizophrenia: an [18F]fluorodopa/positron emission tomography study. *The Journal of neuroscience : the official journal of the Society for Neuroscience*. 27:8080-8087.
12. Nozaki S, Kato M, Takano H, Ito H, Takahashi H, Arakawa R, et al. (2009): Regional dopamine synthesis in patients with schizophrenia using L-[beta-11C]DOPA PET. *Schizophrenia research*. 108:78-84.
  13. Howes OD, Montgomery AJ, Asselin MC, Murray RM, Valli I, Tabraham P, et al. (2009): Elevated striatal dopamine function linked to prodromal signs of schizophrenia. *Arch Gen Psychiatry*. 66:13-20.
  14. Howes O, Bose S, Turkheimer F, Valli I, Egerton A, Stahl D, et al. (2011): Progressive increase in striatal dopamine synthesis capacity as patients develop psychosis: a PET study. *Molecular psychiatry*. 16:885-886.
  15. Howes OD, Bose SK, Turkheimer F, Valli I, Egerton A, Valmaggia LR, et al. (2011): Dopamine synthesis capacity before onset of psychosis: a prospective [18F]-DOPA PET imaging study. *Am J Psychiatry*. 168:1311-1317.
  16. Egerton A, Chaddock CA, Winton-Brown TT, Bloomfield MA, Bhattacharyya S, Allen P, et al. (2013): Presynaptic striatal dopamine dysfunction in people at ultra-high risk for psychosis: findings in a second cohort. *Biological psychiatry*. 74:106-112.
  17. Howes OD, Williams M, Ibrahim K, Leung G, Egerton A, McGuire PK, et al. (2013): Midbrain dopamine function in schizophrenia and depression: a post-mortem and positron emission tomographic imaging study. *Brain : a journal of neurology*. 136:3242-3251.
  18. Demjaha A, Murray RM, McGuire PK, Kapur S, Howes OD (2012): Dopamine synthesis capacity in patients with treatment-resistant schizophrenia. *Am J Psychiatry*. 169:1203-1210.
  19. Roiser JP, Howes OD, Chaddock CA, Joyce EM, McGuire P (2013): Neural and behavioral correlates of aberrant salience in individuals at risk for psychosis. *Schizophrenia bulletin*. 39:1328-1336.
  20. Allen P, Luigjes J, Howes OD, Egerton A, Hirao K, Valli I, et al. (2012): Transition to psychosis associated with prefrontal and subcortical dysfunction in ultra high-risk individuals. *Schizophrenia bulletin*. 38:1268-1276.
  21. Abi-Dargham A, Rodenhiser J, Printz D, Zea-Ponce Y, Gil R, Kegeles LS, et al. (2000): Increased baseline occupancy of D2 receptors by dopamine in schizophrenia. *Proceedings of the National Academy of Sciences of the United States of America*. 97:8104-8109.

22. Abi-Dargham A, van de Giessen E, Slifstein M, Kegeles LS, Laruelle M (2009): Baseline and amphetamine-stimulated dopamine activity are related in drug-naive schizophrenic subjects. *Biological psychiatry*. 65:1091-1093.
23. Kegeles LS, Abi-Dargham A, Frankle WG, Gil R, Cooper TB, Slifstein M, et al. (2010): Increased synaptic dopamine function in associative regions of the striatum in schizophrenia. *Arch Gen Psychiatry*. 67:231-239.
24. Laruelle M, Abi-Dargham A, van Dyck CH, Gil R, D'Souza CD, Erdos J, et al. (1996): Single photon emission computerized tomography imaging of amphetamine-induced dopamine release in drug-free schizophrenic subjects. *Proceedings of the National Academy of Sciences of the United States of America*. 93:9235-9240.
25. Breier A, Su TP, Saunders R, Carson RE, Kolachana BS, de Bartolomeis A, et al. (1997): Schizophrenia is associated with elevated amphetamine-induced synaptic dopamine concentrations: evidence from a novel positron emission tomography method. *Proceedings of the National Academy of Sciences of the United States of America*. 94:2569-2574.
26. Abi-Dargham A, Gil R, Krystal J, Baldwin RM, Seibyl JP, Bowers M, et al. (1998): Increased striatal dopamine transmission in schizophrenia: confirmation in a second cohort. *Am J Psychiatry*. 155:761-767.
27. Laruelle M, Abi-Dargham A, Gil R, Kegeles L, Innis R (1999): Increased dopamine transmission in schizophrenia: relationship to illness phases. *Biological psychiatry*. 46:56-72.
28. Pogarell O, Koch W, Karch S, Dehning S, Muller N, Tatsch K, et al. (2012): Dopaminergic neurotransmission in patients with schizophrenia in relation to positive and negative symptoms. *Pharmacopsychiatry*. 45 Suppl 1:S36-41.
29. Mizrahi R, Addington J, Rusjan PM, Suridjan I, Ng A, Boileau I, et al. (2012): Increased stress-induced dopamine release in psychosis. *Biological psychiatry*. 71:561-567.
30. Slifstein M, van de Giessen E, Van Snellenberg J, Thompson JL, Narendran R, Gil R, et al. (2015): Deficits in prefrontal cortical and extrastriatal dopamine release in schizophrenia: a positron emission tomographic functional magnetic resonance imaging study. *JAMA psychiatry*. 72:316-324.
31. Thompson JL, Urban N, Slifstein M, Xu X, Kegeles LS, Girgis RR, et al. (2013): Striatal dopamine release in schizophrenia comorbid with substance dependence. *Molecular psychiatry*. 18:909-915.
32. Mizrahi R, Kenk M, Suridjan I, Boileau I, George TP, McKenzie K, et al. (2014): Stress-induced dopamine response in subjects at clinical high risk for schizophrenia with and without concurrent cannabis use.

- Neuropsychopharmacology : official publication of the American College of Neuropsychopharmacology*. 39:1479-1489.
33. Taylor SF, Koeppe RA, Tandon R, Zubieta JK, Frey KA (2000): In vivo measurement of the vesicular monoamine transporter in schizophrenia. *Neuropsychopharmacology : official publication of the American College of Neuropsychopharmacology*. 23:667-675.
  34. Zubieta JK, Taylor SF, Huguelet P, Koeppe RA, Kilbourn MR, Frey KA (2001): Vesicular monoamine transporter concentrations in bipolar disorder type I, schizophrenia, and healthy subjects. *Biological psychiatry*. 49:110-116.
  35. Laruelle M, Abi-Dargham A, van Dyck C, Gil R, D'Souza DC, Krystal J, et al. (2000): Dopamine and serotonin transporters in patients with schizophrenia: an imaging study with [(123)I]beta-CIT. *Biological psychiatry*. 47:371-379.
  36. Fusar-Poli P, Meyer-Lindenberg A (2013): Striatal presynaptic dopamine in schizophrenia, Part I: meta-analysis of dopamine active transporter (DAT) density. *Schizophrenia bulletin*. 39:22-32.
  37. Arakawa R, Ichimiya T, Ito H, Takano A, Okumura M, Takahashi H, et al. (2009): Increase in thalamic binding of [(11)C]PE2I in patients with schizophrenia: a positron emission tomography study of dopamine transporter. *Journal of psychiatric research*. 43:1219-1223.
  38. Nakajima S, Caravaggio F, Mamo DC, Mulsant BH, Chung JK, Plitman E, et al. (2015): Dopamine D(2)/(3) receptor availability in the striatum of antipsychotic-free older patients with schizophrenia-A [(1)(1)C]-raclopride PET study. *Schizophrenia research*. 164:263-267.
  39. Okubo Y, Suhara T, Suzuki K, Kobayashi K, Inoue O, Terasaki O, et al. (1997): Decreased prefrontal dopamine D1 receptors in schizophrenia revealed by PET. *Nature*. 385:634-636.
  40. Karlsson P, Farde L, Halldin C, Sedvall G (2002): PET study of D(1) dopamine receptor binding in neuroleptic-naive patients with schizophrenia. *Am J Psychiatry*. 159:761-767.
  41. Abi-Dargham A, Mawlawi O, Lombardo I, Gil R, Martinez D, Huang Y, et al. (2002): Prefrontal dopamine D1 receptors and working memory in schizophrenia. *The Journal of neuroscience : the official journal of the Society for Neuroscience*. 22:3708-3719.
  42. Abi-Dargham A, Xu X, Thompson JL, Gil R, Kegeles LS, Urban N, et al. (2012): Increased prefrontal cortical D(1) receptors in drug naive patients with schizophrenia: a PET study with [(1)(1)C]NNC112. *Journal of psychopharmacology (Oxford, England)*. 26:794-805.

43. Thompson JL, Rosell DR, Slifstein M, Girgis RR, Xu X, Ehrlich Y, et al. (2014): Prefrontal dopamine D1 receptors and working memory in schizotypal personality disorder: a PET study with [(1)(1)C]NNC112. *Psychopharmacology (Berl)*. 231:4231-4240.
44. Fusar-Poli P, Borgwardt S, Bechdolf A, Addington J, Riecher-Rossler A, Schultze-Lutter F, et al. (2013): The psychosis high-risk state: a comprehensive state-of-the-art review. *JAMA psychiatry*. 70:107-120.
